# Supplementary material for: MicroRNA-216a is essential for cardiac angiogenesis
Source: PubMed Central journal article supplement — Mol Ther. 2023 Apr 17;31(6):1807–28. doi: 10.1016/j.ymthe.2023.04.007 (PMC10277893; doi:10.1016/j.ymthe.2023.04.007), 2023-04-17
Supplement: mmc1.pdf [file mmc1.pdf]

## **Supplemental Information**

### **MicroRNA-216a is essential for cardiac angiogenesis**

**Rio P. Juni, Jordy M.M. Kocken, Ricardo C. Abreu, Lara Ottaviani, Tim Davalan, Burcu Duygu, Ella M. Poels, Aliaksei Vasilevich, Jana C. Hegenbarth, Mahesh Appari, Nicole Bitsch, Serve Olieslagers, Dorien M. Schrijvers, Monika Stoll, Joerg Heineke, Jan de Boer, Leon J. de Windt, and Paula A. da Costa Martins**

# Figure S1

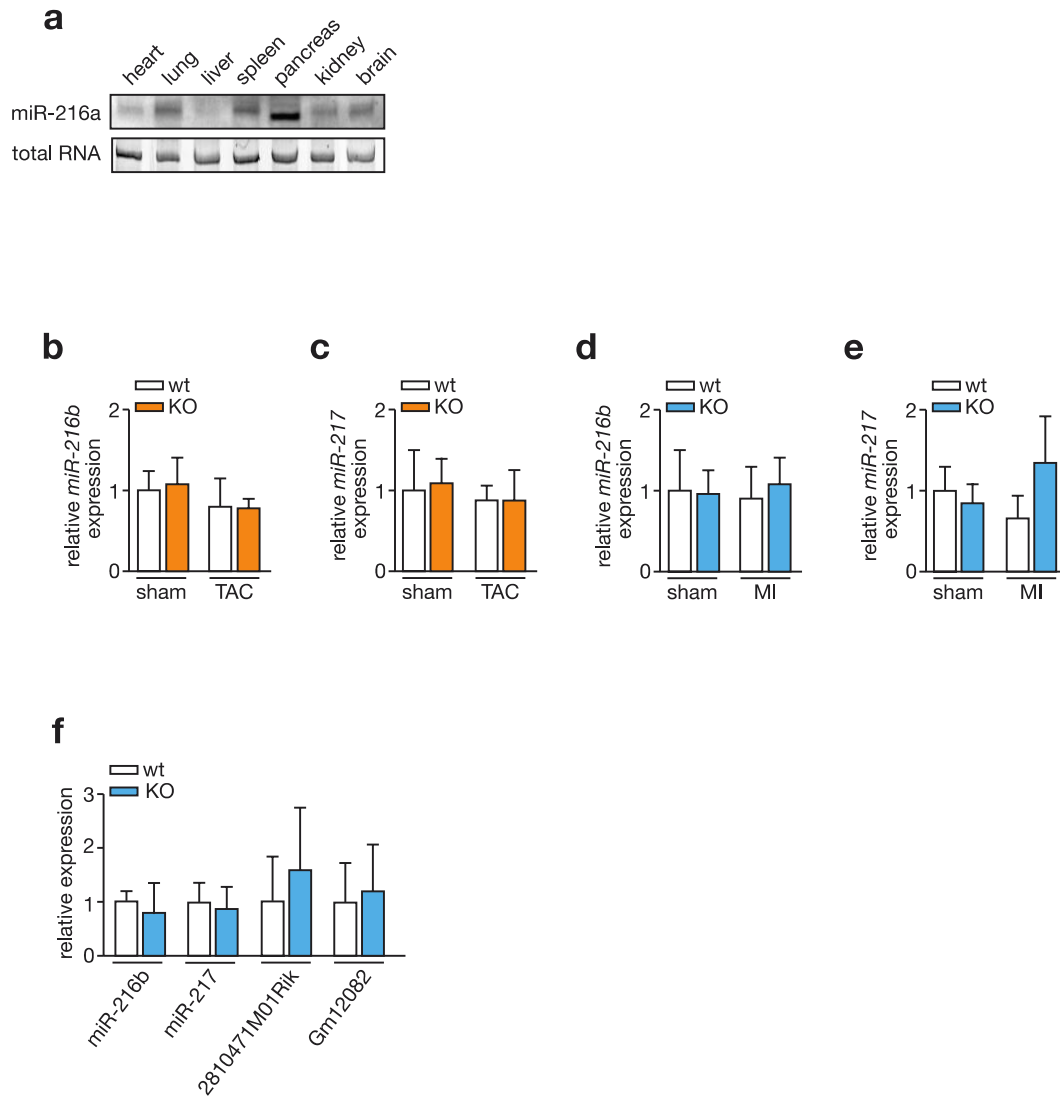

Figure S1 | (a) Northern blotting analysis of *miR-216a-5p* expression in different organs from wild-type mice. *Rnu6-2* was used as a loading control; (b-e) QPCR data showing that other cluster members are not affected under conditions of cardiac stress; n refers to number of hearts: n=3 per group. (f) QPCR data showing that our *miR-216a* target strategy does not affect other cluster members nor the neighboring lncRNAs. n refers to number of hearts: n=3 per group.

## Figure S2

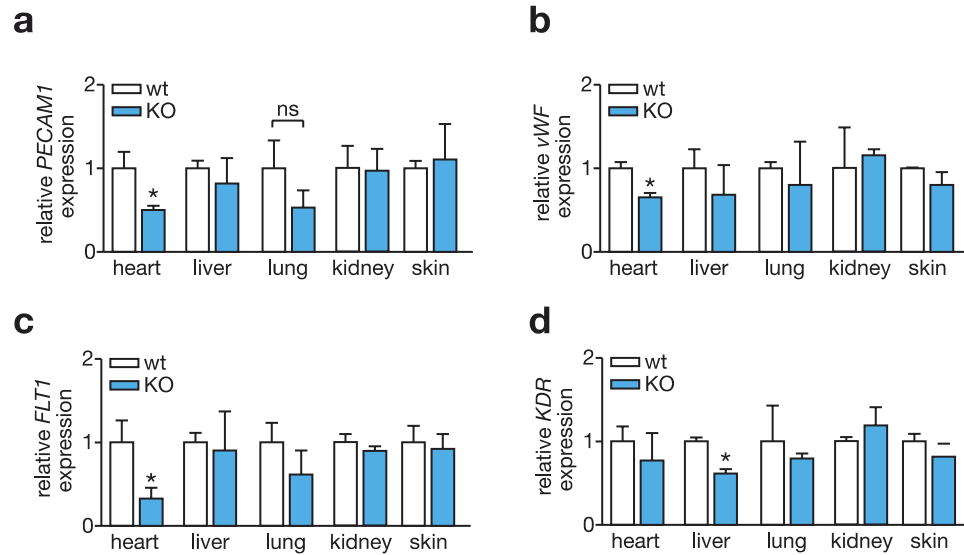

Figure S2 |(a-d) Real-time PCR analysis of transcript abundance for several endothelial cell markers: *Pecam1*, *vwf*, *Flt1* and *Kdr*, in different tissues derived from wt and KO mice. n refers to number of hearts: n=4 per group.

# Figure S3

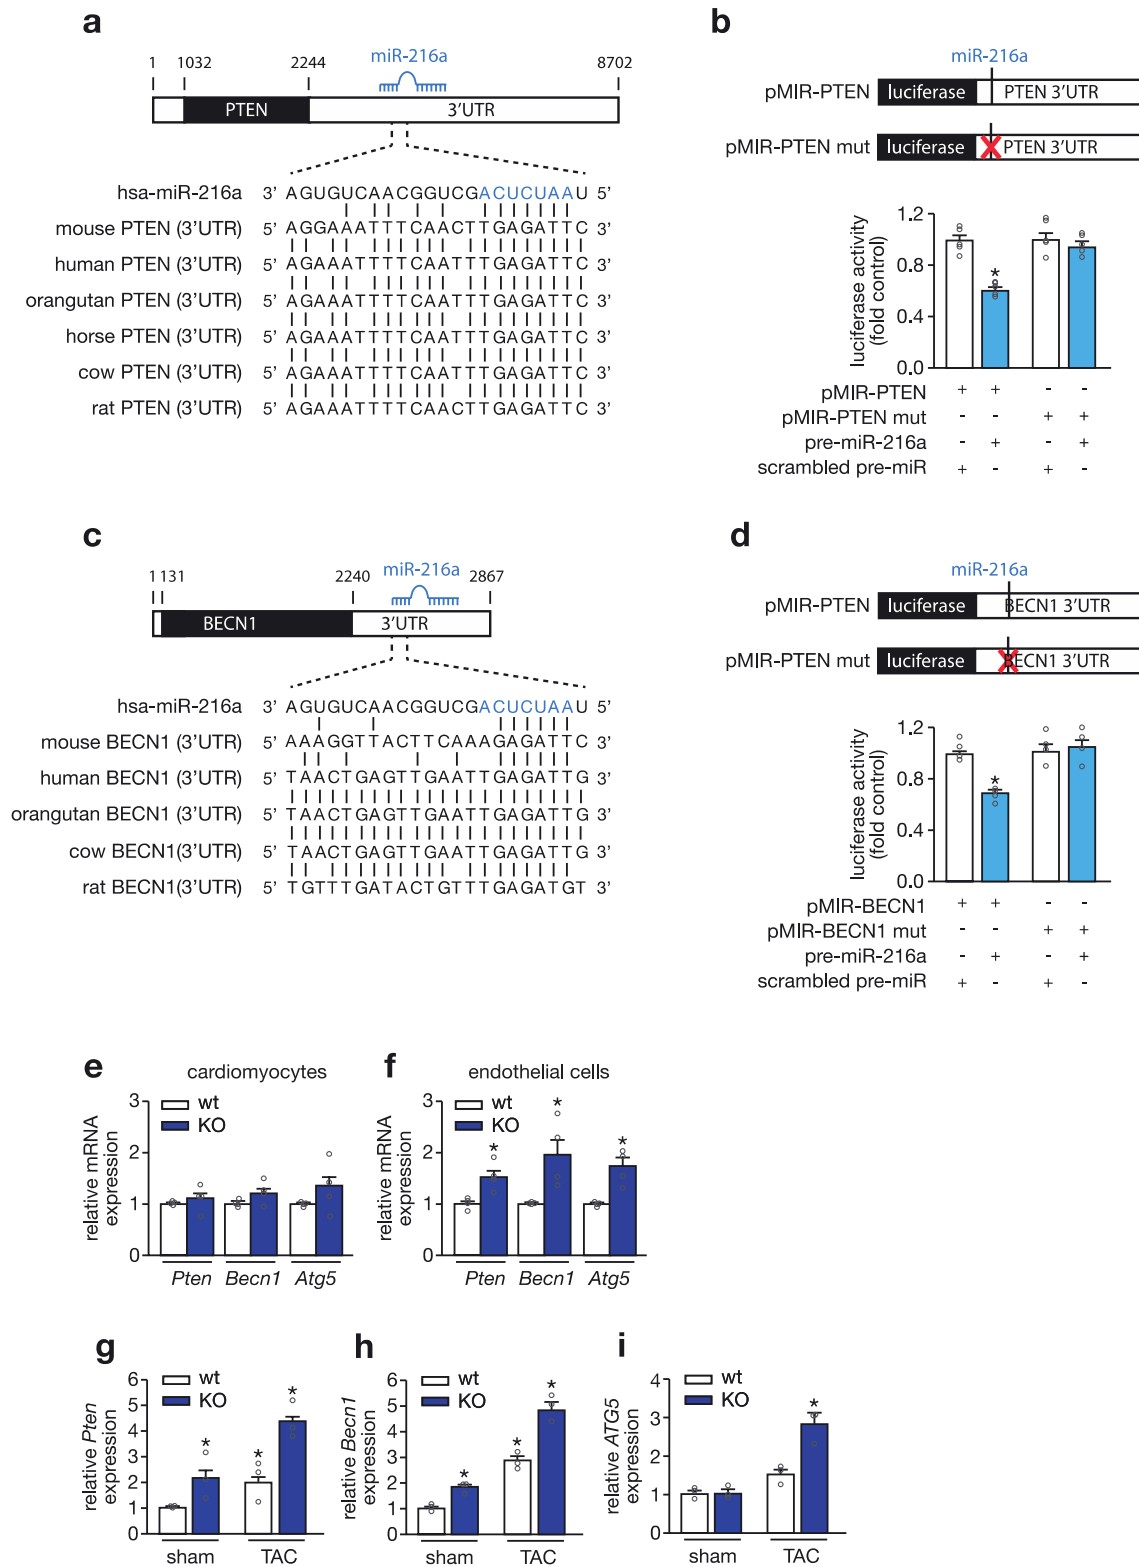

Figure S3 | (a) Location and evolutionary conservation of *hsa-miR-216a-5p* seed region on *PTEN* 3'UTR. (b) Schematic representation of luciferase reporter constructs harboring either the intact or the mutated *miR-216a* binding site on *PTEN* 3'UTR (top panel) and quantification of luciferase activity after co-transfection of HUVECs with *pre-miR-216a* (bottom panel); a scrambled precursor molecule was used as control; n refers to independent experiments (n=5). (c) Location and evolutionary conservation of *hsa-miR-216a-5p* seed region on *BECN1* 3'UTR. (d) Schematic representation of luciferase reporter constructs harboring either the intact or the mutated *miR-216a* binding site on *BECN1* 3'UTR (top panel) and quantification of luciferase activity after co-transfection of HUVECs with *pre-miR-216a* (bottom panel); a scrambled precursor molecule was used as control; n refers to independent experiments (n=4). (e,f) Real-time PCR analysis of the expression of *Pten*, *Becn1* and *Atg5* in (e) cardiomyocytes and (f) endothelial cells isolated from myocardial tissue of wt and KO mice, n = 4 hearts per group. (g-i) Real-time PCR analysis of the expression of *Pten* (g), *Becn1* (h) and *Atg5* (i) in myocardial tissue of wt and KO mice subjected to sham or TAC surgery, n refers to number of hearts (n=3 for each condition). In all panels numerical data are presented as mean (error bars show s.e.m.); statistical significance was calculated using two-tailed unpaired t-test when comparing two experimental groups or two-way ANOVA followed by Tukey's multiple comparison test, when comparing more than two experimental groups. \*P<0.05 versus corresponding control group.

**Table S1 |** microRNA screen results

(excel file)

**Table S2: RNA sequencing results showing most up and downregulated genes upon miR-216a overexpression in endothelial cells.**

| ENSEMBL gene ID | baseMean            | log2FoldChange       | pvalue               | padj                 | hgnc_symbol |
|-----------------|---------------------|----------------------|----------------------|----------------------|-------------|
| ENSG00000163513 | 673.708.710.753.919 | -0.611990155141959   | 2,27E-122            | 2,32E-119            | TGFB2       |
| ENSG00000171033 | 131.200.903.152.731 | 100.048.797.073.057  | 1,18E-45             | 6,08E-41             | PKIA        |
| ENSG00000142867 | 123.773.927.304.601 | -0.593092906548889   | 4,37E-23             | 1,49E-18             | BCL10       |
| ENSG00000087842 | 602.556.621.044.263 | -0.725944134842392   | 6,26E-08             | 9,18E-05             | PIR         |
| ENSG00000071967 | 288.313.975.937.435 | 0.736262568051788    | 5,22E-02             | 4,12E+01             | CYBRD1      |
| ENSG00000124145 | 500.080.636.288.422 | -0.674079717031292   | 5,16E-01             | 3,41E+02             | SDC4        |
| ENSG00000171720 | 387.666.140.250.179 | -0.68117650612579    | 3,79E+00             | 1,94E+03             | HDAC3       |
| ENSG00000059804 | 392.803.858.033.049 | -0.637160843353113   | 7,41E+03             | 2,24E+06             | SLC2A3      |
| ENSG00000106688 | 256.609.367.262.772 | -0.687150753693311   | 1,66E+04             | 4,27E+05             | SLC1A1      |
| ENSG00000283239 | 163.331.423.147.394 | -349.223.466.653.225 | 3,04E+05             | 6,12E+07             | KBTBD11-OT1 |
| ENSG00000260342 | 486.038.280.826.969 | 250.745.449.392.809  | 3,22E+05             | 6,25E+07             |             |
| ENSG00000090339 | 949.230.615.292.808 | -0.920524710166      | 9,78E+05             | 1,79E+08             | ICAM1       |
| ENSG00000130821 | 22.619.076.325.122  | -0.606701516918977   | 2,27E+06             | 3,76E+08             | SLC6A8      |
| ENSG00000164938 | 177.529.154.934.185 | -0.64614706301234    | 1,29E+07             | 1,87E+09             | TP53INP1    |
| ENSG00000164494 | 19.185.752.461.795  | -0.631177914354996   | 2,61E+07             | 3,39E+09             | PDSS2       |
| ENSG00000141562 | 259.029.209.859.613 | 0.605109599524017    | 1,50E+08             | 0.000158364679480824 | NARF        |
| ENSG00000259623 | 210.143.723.351.988 | 0.598990700238616    | 3,06E+08             | 0.000293852365673068 |             |
| ENSG00000157111 | 873.007.108.596.805 | -0.730204166795773   | 9,19E+08             | 0.0007727535459837   | TMEM171     |
| ENSG00000139645 | 157.249.711.531.211 | -121.755.981.137.284 | 2,20E+09             | 0.00163728696194362  | ANKRD52     |
| ENSG00000136859 | 23.439.383.347.952  | 0.585882775413566    | 3,05E+09             | 0.0021126788589627   | ANGPTL2     |
| ENSG00000110080 | 108.863.523.856.776 | -0.636357046235934   | 4,46E+09             | 0.0028814499234559   | ST3GAL4     |
| ENSG00000099804 | 490.903.947.075.811 | -0.934650519410166   | 6,53E+09             | 0.00373991888720579  | CDC34       |
| ENSG00000137575 | 348.968.353.315.411 | -0.669418883549087   | 9,28E+09             | 0.00490961409946267  | SDCBP       |
| ENSG00000173875 | 249.713.312.360.511 | 0.837284494600489    | 0.000129678992552782 | 0.0066869710610653   | ZNF791      |

**Table S3. Primer sequences used for quantitative real time PCR.**

| Gene name      | Gene identification | sequence                       |
|----------------|---------------------|--------------------------------|
| <i>Nppa</i>    | (NM_008725)         | 5'-TCTTCCTCGTCTTGGCCTTT3'      |
|                |                     | 5'-CCAGGTGGTCTAGCAGGTTTC-3'    |
| <i>Nppb</i>    | (NM_008726)         | 5'-TGGGAGGTCACCTCTATCCT-3'     |
|                |                     | 5'-GGCCATTTCTCCGACTTT-3'       |
| <i>Acta1</i>   | (NM_009606)         | 5'-CCGGGAGAAGATGACTCAA-3'      |
|                |                     | 5'-GTAGTACGGCC GGAAGCATA-3'    |
| <i>Myh7</i>    | (NM_080728)         | 5'-CGGACCTTGAAGACCAGAT-3'      |
|                |                     | 5'-GACAGC TCCCATTCTCTGT-3'     |
| <i>Rcan1.4</i> | (NM_019466)         | 5'-GCTTGACTGAGAGCGGAGTC-3'     |
|                |                     | 5'-CCACACAAGCAATCAGGGAGC-3'    |
| <i>L7</i>      | (NM_011291)         | 5'-GAAGCTCATCTATGAGAAGGC-3'    |
|                |                     | 5'-AAGACGAAGGAGCTGCAGAAC-3'    |
| <i>FLT1</i>    | (NM_001159920)      | 5'-CCGGCTCTCTATGAAAGTGAAG-3'   |
|                |                     | 5'-CGAGTAGCCACGAGTCAAATAG-3'   |
| <i>KDR</i>     | (NM_002253)         | 5'-AGCAGGATGGCAAAGACTAC-3'     |
|                |                     | 5'-TACTTCCTCCTCCTCCATACAG-3'   |
| <i>CDH5</i>    | (NM_001795)         | 5'-GTTACCTTCTGCGAGGATATG-3'    |
|                |                     | 5'-GATGGTGAGGATGCAGAGTAAG-3'   |
| <i>PECAM1</i>  | (NM_000442)         | 5'-GGTGGATGAGTCCAGATTTTC-3'    |
|                |                     | 5'-GATGGGACCAGATCCTTCATTC-3'   |
| <i>ANGTL2</i>  | (NM_0012098)        | 5'-CACCATCCATCACCCACTTATC      |
|                |                     | 5'-GAGTACAGCAGAGCGGAAG-3'      |
| <i>CLDN12</i>  | (NM_001185072)      | 5'-GCATACTTACTCACAGCCCTATT-3'  |
|                |                     | 5'-GGGAATGTGAGGCTACAAGAA-3'    |
| <i>TGFBR2</i>  | (NM_001024847)      | 5'-TTAGAGAGGGACTGGTAGTGAG-3'   |
|                |                     | 5'-AGACCTTCCACCATCCAACAGAGC-3' |
| <i>HDAC3</i>   | (NM_003883)         | 5'-GACTGAGATTGCCTCTGACTTC-3'   |
|                |                     | 5'-CATCTGGGATTCAGGTGTTAGG-3'   |
| <i>BCL10</i>   | (NM_003921)         | 5'-GCCACCATGCCTCACTAAT-3'      |
|                |                     | 5'-GGTGGCTCGTCTGTAATC-3'       |
| <i>ICAM1</i>   | (NM_000201)         | 5'-GTAGCAGCCGAGTCATAAT-3'      |
|                |                     | 5'-GGGCCTGTTGAGTCTGTATT-3'     |
